# Artificial selection optimizes pollutant-degrading bacterial communities

Flor I. Arias-Sánchez<sup>1,2</sup>, Björn Vessman<sup>2</sup>, Alice Haym<sup>2</sup>, Géraldine Alberti<sup>2</sup>, and Sara Mitri<sup>2,3</sup>

<sup>1</sup>BIH Center for Regenerative Therapies (BCRT), Charité - Universitätsmedizin Berlin, Berlin, Germany

<sup>2</sup>Département de Microbiologie Fondamentale, Université de Lausanne, 1015 Lausanne, Switzerland

<sup>3</sup>Swiss Institute of Bioinformatics

**Abstract.** Artificial selection is a promising way to improve microbial community functions, but previous experiments have only shown moderate success. Here, we experimentally evaluate a new method that was inspired by genetic algorithms to artificially select small bacterial communities of known species composition based on their degradation of an industrial pollutant. Starting from 29 randomly generated four-species communities, we repeatedly grew communities for four days, selected the 10 best-degrading communities, and rearranged them into 29 new communities with species compositions that resembled those of the most successful ones. The best community after 18 such rounds of selection degraded the pollutant better than the best community in the first round. It featured member species that degrade well, species that degrade badly alone but improve community degradation, and free-rider species that did not contribute to community degradation. Most species in the evolved communities did not differ significantly from their ancestors, suggesting that genetic evolution plays a small role at this time scale. These experiments show that artificial selection on microbial communities can work in principle, and inform on how to improve future experiments.

## Introduction

Microbial communities naturally provide us with many ecosystem functions like digesting inaccessible nutrients or cleaning wastewater. Being able to design such multi-species communities from scratch to optimize ecosystem functions would be a major biotechnological breakthrough, but knowing which species to combine and how such a choice will affect ecological and evolutionary dynamics and thereby functional dynamics is a very challenging problem.

A first intuitive approach is to collect candidate species, study their capacities through genomic and phenotypic analyses and then combine them in clever ways that are likely to result in high function (1–4). An alternative is to automate the optimization process while remaining blind to the properties of each species. This blind approach can be taken using artificial selection (5, 6).

Artificial selection – also known as “directed evolution” or simply “breeding” – is a powerful approach that takes inspiration from natural selection. Not only has it revolutionized agriculture (7), but artificial selection has also been successfully applied in chemistry to optimize industrial enzymes (8, 9), or in pharmacy to reduce HIV drug production costs (10). These success stories have sparked the idea of artificially selecting microbial communities, promising to enhance human and ecosystem health, as well as many industrial applications.

In the year 2000, Swenson et al. (11, 12) published two studies selecting natural microbial communities to increase plant biomass, to degrade an environmental pollutant or to alter the pH of an aquatic ecosystem. Although selected communities occasionally improved over time, they also observed improvements in some control lines and overall, community performance didn’t differ significantly from the start of the experiments. Many studies have since followed, selecting for various host effects (13–18), production or consumption of chemicals (19–21) or simply for population size (22, 23). The success of these experiments has also been limited (6, 24), often showing inconsistent results between repeats or only a moderate increase in function.

One fundamental difficulty with artificially selecting communities is that selection is applied at the group level – rather than the individual level as with conventional breeding – with individual organisms going through several generations within each selection round, resulting in little control over ecological and evolutionary dynamics occurring within each community and within each species (5, 25, 26). This means that over time, (i) competition between species may lead to the extinction of slower-growing species that may contribute to community function (6, 27), and (ii) assuming a trade-off between function and growth, competition within species selects for cheater mutants that do not contribute to the function and sweep to fixation (27, 28).

A second problem with the existing approaches lies in how “offspring” communities are generated from their “parents”

76 at every round: parent communities are either simply diluted 123  
77 to make offspring (low abundant species may go extinct) 124  
78 or pooled together and then distributed over the offspring 125  
79 communities. Both approaches result in offspring commu- 126  
80 nities that are very similar to one another, and do not deviate 127  
81 much from the communities at the start of the experiment 128  
82 (20, 29). The resulting lack of variability between communi- 129  
83 ties gives little material for artificial selection to work on. The 130  
84 challenge then is to develop a selection method that favors 131  
85 cooperation within and between species, while maintaining 132  
86 between-community variability and selecting for increased 133  
87 function at the community level. 134

88 Here we address these fundamental problems by experimen- 135  
89 tally testing a novel selection approach called “disassembly 136  
90 selection” that was inspired by optimization algorithms from 137  
91 the computational sciences called genetic algorithms (30, 31) 138  
92 and that we have evaluated theoretically (29). We use a com- 139  
93 putational algorithm to guide lab experiments in real-time to 140  
94 automatically explore the species composition search space: 141  
95 we randomly generate communities of known species com- 142  
96 position, and then repeatedly select the best-scoring com- 143  
97 munities, disassemble their member species and re-assemble 144  
98 new communities that differ slightly in their composition 145  
99 for the next round. This approach improves performance 146  
100 while maintaining between-community variability (29). To 147  
101 limit competition within communities and avoid aggressive 148  
102 species that exclude all others, we penalize communities 149  
103 where species extinctions occur. 150

104 We use our approach to find a community that can optimally 151  
105 degrade industrial pollutants called Metal Working Fluids 152  
106 (MWFs), a challenge we have previously studied using a sin- 153  
107 gle four-species bacterial community (32). As this original 154  
108 community could only degrade 44.4% of the MWF on aver- 155  
109 age, we hypothesized that there would be room for improve- 156  
110 ment. 157

111 After 18 rounds of selection, we found a four-species com- 158  
112 munity that degraded 75.1% of the MWF on average, signifi- 159  
113 cantly better than our original community (32), the best com- 160  
114 munity in the first round, and a random control. Despite this 161  
115 successful outcome, we separately found a species pair that 162  
116 performed at least as well as the top community, suggesting 163  
117 that our approach can still be simplified and improved. 164

## 118 Results 165

119 **Degradation efficiency increased over 18 rounds.** 167  
120 Briefly, we designed a community selection method where 11 168  
121 species were first randomly combined into 29 communities 169  
122 of four species each. We let these 29 communities grow for 170

four days, scored them according to their degradation ability  
(penalizing for species extinctions), “disassembled” the top  
ten by selective plating, sampled viable cells of each species  
and used them to rebuild a new round of 29 communities that  
resembled the best-scoring ones. Resemblance was achieved  
by either rebuilding the exact same communities as in the  
previous round – even with the same starting population sizes  
for each species – or by randomly exchanging one member  
species in a winning community to introduce some variabil-  
ity and to ensure that all 11 species remained in the meta-  
community. We carried out this procedure 18 times, with one  
round per week (Methods, Fig. 1A).

To test whether our selection approach could find communi-  
ties that degraded better than the random species combina-  
tions at the start and that this was due to community-level se-  
lection, we included a control treatment where communities  
propagated to the next round were selected randomly rather  
than based on their degradation score. We compared the five  
best-degrading communities in the two treatments (“random”  
and “selection”) at each round. Only considering the top five  
allows us to exclude the noise introduced by composing new,  
possibly poorly-performing, communities (Fig. S1). The top  
five communities in the last round of the selection treatment  
scored higher than the top five initial communities from both  
treatments (round 0:  $62.28\% \pm 4.92$  vs. round 18 selection:  
 $73.42\% \pm 7.38$ , Wilcoxon rank-sum test with continuity cor-  
rection,  $df = 15$ ,  $p = 0.012$ ), and than those in the last round  
of the random treatment (round 18 random:  $63.47\% \pm 5.49$ ,  
random vs. selection  $df = 9$ ,  $p = 0.033$ ). In contrast, the top  
5 from the last round of the random treatment did not degrade  
significantly better than the initial communities (random vs.  
initial  $df = 15$ ,  $p = 0.85$ , Fig. 1B).

Throughout our experiment, we tested 167 different com-  
binations of four species (141 in the selection and 156 in  
the random treatment, with some overlap) out of 174 pos-  
sible permutations of 11 species (some species combinations  
were avoided as they were indistinguishable using selective  
plates, see Methods). The selection treatment tested high-  
performing communities more often than the random treat-  
ment, and this occurred preferentially in the later rounds of  
the experiment (Fig. 1C, S2), showing selection for improved  
degradation and the maintenance of high-performing com-  
munities. Our approach also continued to explore the search  
space by testing many new communities at each round: in  
round 18 there were still communities with low degradation  
scores (Fig. 1C).

We next asked whether the communities with the highest  
degradation scores resembled each other in terms of species

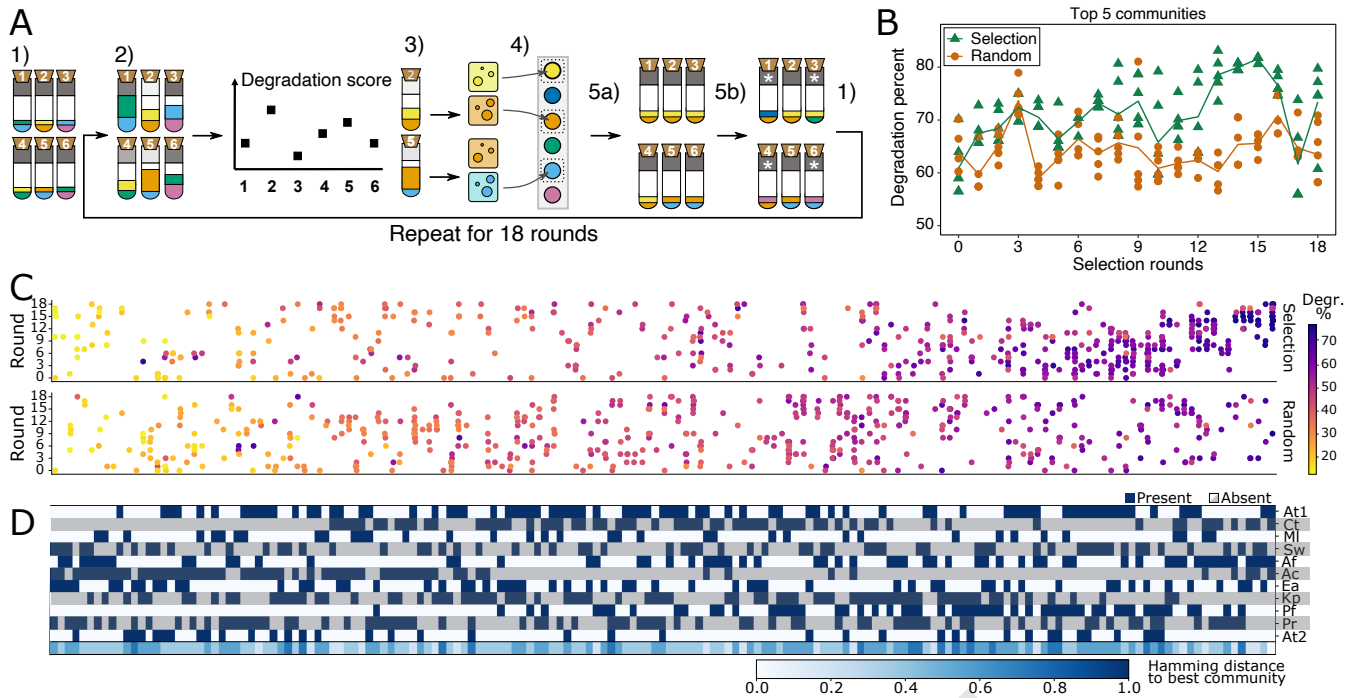

**Fig. 1.** Selection method and its performance. A) Illustration of the selection method (see Methods for details). Each tube represents a community of four species (two colors drawn for illustrative purposes): 1) Define 29 communities of randomly drawn species and inoculate each community in MWF+AA. 2) Following growth, measure degradation score as the difference in pollution load to an abiotic control, illustrated by the gray field at the top of each tube. 3) Select the communities with top 10 degradation scores for disassembly (illustrated by tubes 2 and 5 here) and plate these on selective media to separate their member species. Plating allows to document extinctions and calculate final community scores (combining degradation scores and extinction data). 4) Sample viable cells of each species, only from the corresponding single community with the highest final score. Adjust population size and freeze down. 5a) Generate new communities in proportion to their final community scores. 5b) Randomly choose 21/29 of the new communities (illustrated with 4) for species exchange. Remove one resident species at random and introduce a new species in its place. Assemble the new communities in the lab using the frozen species and repeat from step 2). B) Degradation scores of the 5 best communities in each round for the selection (green triangles) and random (orange circles) treatments, with lines through the average of the 5. C) Community composition (x-axis) vs. degradation score (hue, color bar) for each community over the 18 rounds of selection (y-axis) in the selection (top panel) and random (bottom panel) treatments. The x-axis is ordered by increasing degradation scores (averaged over all instances of the same species composition). Note that these are degradation, not final community scores (extinctions not considered). D) Community composition corresponding to panel C, showing the presence (dark blue) or absence (white/grey) of each species, and illustrating the difference in composition by the Hamming distance (i.e. the number of substitutions needed to transform a given community to another) to the community with the highest degradation score at the bottom.

171 composition. We calculated the Hamming distance to the best 189 growth, community evenness or species survival. Since the  
 172 community (number of species that one must exchange in a 190 selection method penalizes extinctions (we scaled the degra-  
 173 given community to get the same species composition as the 191 dation scores by the fraction of surviving species), we quan-  
 174 best community), which can also be seen as a measure of 192 tified extinctions in each round by plating 10 communi-  
 175 the ruggedness of the “fitness landscape” (4). At first glance, 193 ties per treatment (see Methods) on selective media on day 4 and  
 176 there was no obvious pattern between the similarity in com- 194 comparing the presence of each species to how we composed  
 177 munity composition to the top community and degradation 195 the community on day 0. The distribution of extinctions  
 178 score. However, the best 5 communities had a distribution of 196 per round was significantly lower in the selection compared  
 179 Hamming distances that was significantly different from the 197 to the random control treatment (Kolmogorov–Smirnov test,  
 180 distribution of distances between all pairs of communities in 198  $p = 0.013$ , Fig. 2A, S4, Table S1). As a control, we also  
 181 our study (Student’s t-test,  $p = 8.2 \times 10^{-5}$ , Fig. S3). It also 199 counted the number of contamination events (any species that  
 182 appears that some species, such as *C. testosteroni* (Ct) and *A.* 200 was present at day 4, despite not being inoculated at day 0),  
 183 *faecalis* (Af) tended to be found in the winning communities, 201 which we did not expect to vary significantly between the  
 184 and *P. fulva* (Pf) was rarely in badly-performing communities 202 treatments. Indeed, we found no significant difference in  
 185 (Fig. 1D). We explore this more quantitatively below. 203 contamination events per round between the two treatments  
 204 (Kolmogorov–Smirnov,  $p = 0.8$ ). Despite this difference, an-  
 205 other explanation could be that fewer extinctions occurred  
 206 in the selection than the random treatment because selected

186 **Selection reduced extinctions, but did not increase** 205  
 187 **evenness or total biomass.** We first explore whether se- 206  
 188 lection has favored certain community properties: population

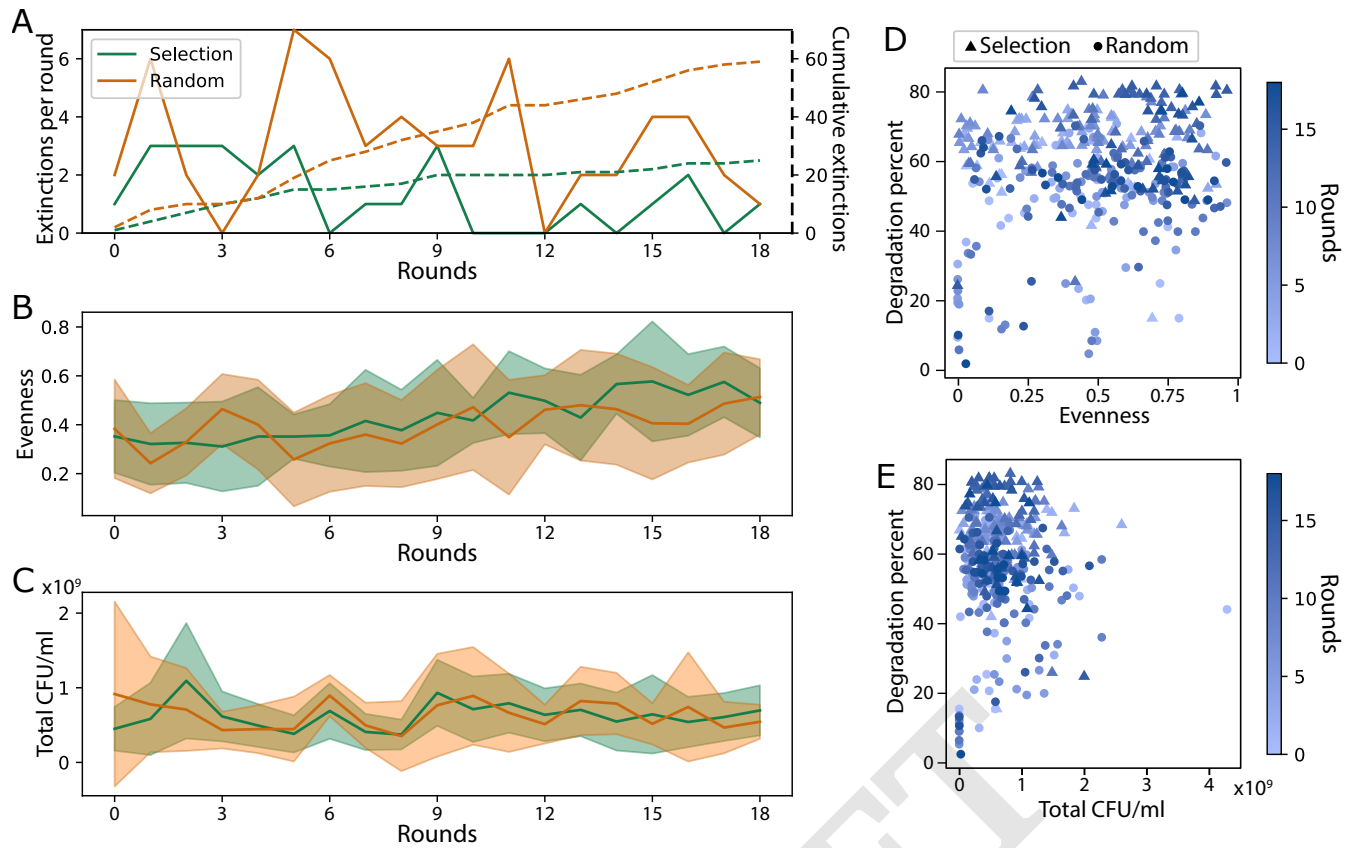

**Fig. 2.** Number of extinctions, evenness and total population size over time. A) Number of extinctions per round (solid lines) and cumulative (dashed lines) in the 10 plated communities of the selection and random treatments. B-C) Mean (lines)  $\pm$  SD (shaded areas) values of the 10 plated communities at each round where B) shows evenness (the effective species number divided by its theoretical maximum value) and C) total population size in CFU/ml. D-E) Degradation percent plotted against D) evenness and E) total population size with the selection treatment in triangles and the random treatment in circles, and color representing selection rounds. Population size, growth or evenness could only be calculated for the 10 communities per treatment that we plated (see Methods).

207 communities more often contained strong growers that pro- 228  
 208 mote the survival of others and increase degradation score 229  
 209 (we highlight communities lacking strong growers in Table 230  
 210 S1). 231  
 211 Next, we ask if communities in the selection treatment were 232  
 212 more even than in the random control. We might expect se- 233  
 213 lection to favor evenness, since species in diverse communi- 234  
 214 ties may complement one another while communities dom- 235  
 215 inated by a single species risk excluding others that could 236  
 216 contribute to degradation. Calculating evenness as the ef- 237  
 217 fective species number relative to its maximum value (Meth- 238  
 218 ods, Eq. (1),(33)), the evenness of the 10 communities whose 239  
 219 populations we quantified increased with time in both treat- 240  
 220 ments (Fig. 2B). The correlation was stronger in the selec- 241  
 221 tion treatment compared to the random control (Spearman's 242  
 222  $\rho = 0.45$  and  $0.24$ , respectively), but the correlations were not 243  
 223 very predictive (ordinary least squares regression between  
 224 evenness and round,  $R^2 = 0.19, 0.06$  at  $p = 1.9 \times 10^{-10}, 244$   
 225  $7.5 \times 10^{-4}$  for selection and random, respectively). 245  
 226 Finally, we might expect the total biomass in communities to 246  
 227 influence degradation for two reasons: (i) degradation could 247

be the aggregated effect of individual cells assuming that all  
 species contribute to degradation, and (ii) as species adapt to  
 the medium, they might increase their growth rates, which  
 should increase degradation. We calculated the total popula-  
 tion size on day 4 per community at each round of selection,  
 but found no significant effect of total biomass or selection  
 treatment on degradation: Total biomass did not correlate  
 strongly with time (Spearman's  $\rho = 0.04, 0.07$ , for selection  
 and random, respectively, Fig. 2C) and was not significantly  
 different between the two treatments. Indeed, degradation  
 score did not even correlate with total biomass (Fig. 2E,  
 Spearman's  $\rho = -0.0062, p = 0.904$ ).

In sum, selection seems to have favored communities whose  
 members are less likely to drive each other extinct, but no  
 other community features could explain the increase in degra-  
 dation scores or the difference between treatments.

**Successful communities were composed of good de-  
 graders, their facilitators and freeriders.** Noticing that  
 certain species were often found in the winning communi-  
 ties, we next explored which species features were selected



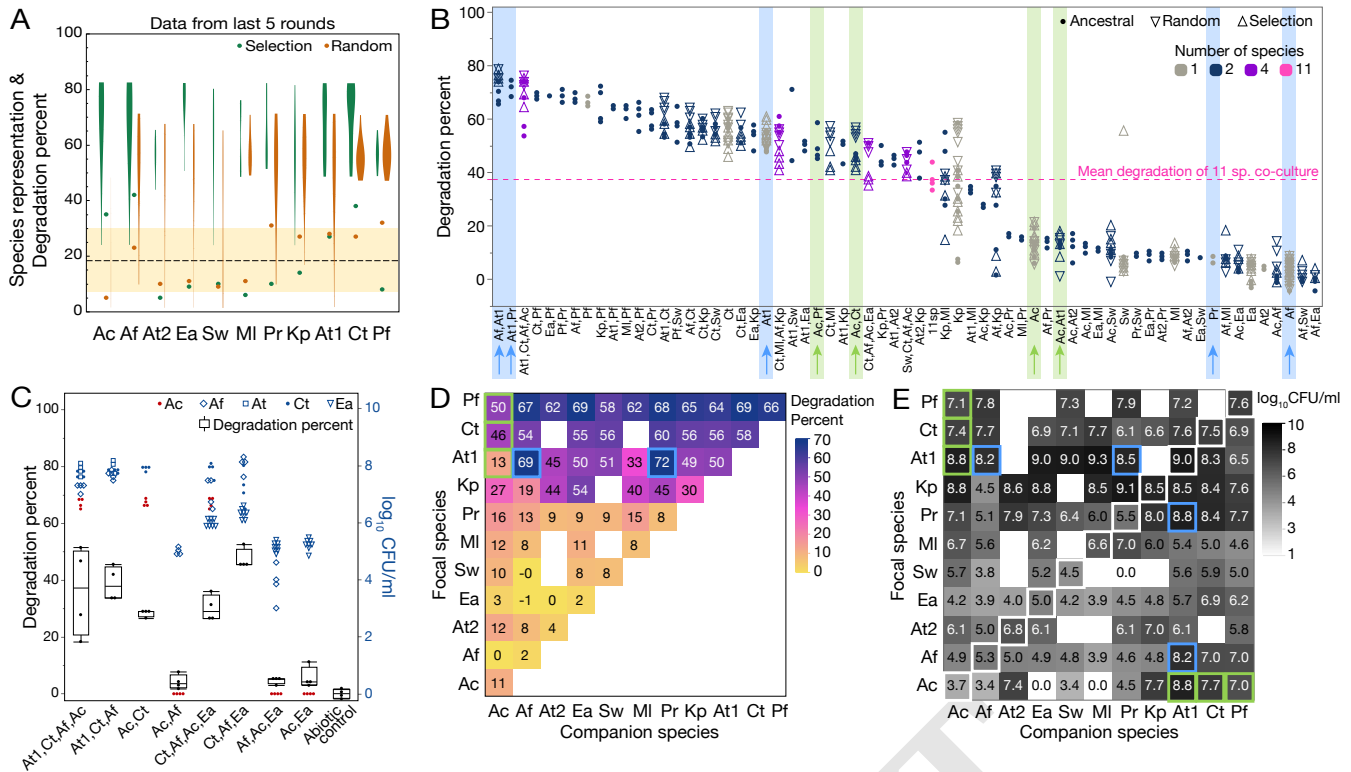

**Fig. 3.** A) Species representation and corresponding percentage of degradation in the last 5 rounds of the evolution experiment. As both measures can be quantified in percent, we display them on the same y-axis. The dashed line represents the average frequency at which we expect to see a given species in the last 5 rounds by chance, and the shaded area one standard deviation away from that average. Points that are outside the shaded area are more or less represented than expected by chance. The violin plots show the degradation scores of communities containing that species. B) Degradation percent on day 3 in monocultures, co-cultures, top communities and 11 species together, using species taken from ancestral strains or strains isolated at the end of the random or selection treatment. Data-points are ordered according to the average degradation % and interesting cases are highlighted with a colored background and arrows corresponding to data shown in panels D and E. C) Experiment to determine whether Ac might be a “free-rider”. Boxplots show the distribution of degradation scores, while dots show population sizes ( $\log_{10}$ CFU/ml, right-hand y-axis) of different species at day 3 of co-cultures as indicated on the x-axis. Ac reduces the degradation score of the communities it is in, or increases their variance. D) Matrix of degradation percentage in mono- (diagonal elements) and co-cultures of ancestral strains only (average of dots in panel B). E) Matrix of population sizes ( $\log_{10}$ CFU/ml) in mono- (diagonal elements highlighted with white squares) and co-cultures of ancestral strains only. In panels B, D and E, we highlight interesting cases in blue and light green that are further discussed in the text.

248 and whether community degradation scores depended on the 266 (At1+Ct+Af+Ac) contained all 3 over-represented species,  
 249 presence of specific species or species combinations. 267 which partially explains their over-representation. However,  
 250 First, we analyzed which species were over- or under- 268 it does not answer how its member species were contributing  
 251 represented in the meta-community compared to what one 269 to the score. High degradation in these communities could  
 252 would expect by chance. For each treatment, we quantified 270 either be due to single species degrading well, or to synergistic  
 253 how often each species appeared among plated communities 271 effects between the species. To find the answer, we grew  
 254 in the last 5 rounds of the experiment ( $n = 10$  at each round). 272 all 11 species alone and in most pair-wise co-cultures and  
 255 If a species’ frequency was more than one standard deviation 273 ranked them from best to worst degradation. We included  
 256 above or below the frequency one would expect by chance 274 four of the best 4-species communities and all eleven species  
 257 (18.18), we designate it as over- or under-represented, re- 275 grown together, as a reference (Fig. 3B). We observed a wide  
 258 spectively (mean $\pm$ SD= 18.18 $\pm$ 11.8; Fig. 3A dashed line, 276 variation in degradation abilities, and to our surprise, all 11  
 259 shaded area). Over-represented species were: Ct, Af and Ac 277 species together ranked 35th (dashed line in Fig. 3B), which  
 260 in the selection treatment, and Pf and Pr in the random treat- 278 is well below what even single species could achieve.  
 261 ment, while MI and At2 were under-represented in the selec- 279  
 262 tion treatment and Ac in the random treatment. The commu- 280  
 263 nities that contained the over-represented species tended to 281  
 264 be associated with high degradation scores (Fig. 3A). 282  
 265 The best-scoring community in the selection treatment 283 The best individual degraders were Pf, Ct and At1 (mean  
 degradation: 66%, 58% and 50% respectively), while Af, Ea  
 and At2 were the worst (mean degradation: 2%, 2% and 4%  
 respectively, Fig. 3B, D). Interestingly, Af which is one of the  
 worst degraders, was present in many winning communities.

284 This may be because when combined with At1, it achieves 332  
285 one of the highest degradation scores (Fig. 3B, D blue high- 333  
286 light). Compared to their growth in monoculture, At1 pro- 334  
287 moted the growth of Af by more than 3 logs, although Af 335  
288 reduced the growth of At1 (Fig. 3E blue highlight). 336

289 Surprisingly, not all good degraders were over-represented in  
290 the selection treatment. Pf and At1 each featured in only 2 of 337  
291 the 10 best communities (Fig. 1D), despite Pf being the best- 338  
292 performing species alone and featuring in 8 of the 10 best 339  
293 pairs (Fig. 3B, D). In contrast, Ct was present in 7 out of the 340  
294 10 winning communities (Fig. 1D). 341

295 We also analyzed which species were most present when ex- 342  
296 tinctions occurred, as we selected against extinctions. In the 343  
297 20 communities of the selection treatment where extinctions 344  
298 occurred, the species most often found were At1, Pr and Pf 345  
299 (13, 12 and 12, respectively, Fig. S4). In 9 of the 20 commu- 346  
300 nities, At1 and Pr were both present, which may explain why 347  
301 they do not feature together in the best 10 communities (Fig. 348  
302 1D), despite being one of the best degrading pairs (Fig. 3B, D 349  
303 blue highlight). In contrast, only 2 extinction events occurred 350  
304 in the selection treatment when Ct was present. Even if At1 351  
305 was often associated with extinctions, it greatly increased the 352  
306 growth of Af and Pr, resulting in the best-degrading pairs 353  
307 (Fig. 3B, D blue highlights), of which one (At1+Af) was 354  
308 present in the winning community. 355

309 The third over-represented species is Ac, which on its own 356  
310 was one of the worst degraders (mean degradation: 11%). 357  
311 And although its degradation improved greatly when together 358  
312 with Pf and Ct (mean degradation: 50% and 46%, respec- 359  
313 tively), these degradation scores were lower than what Pf 360  
314 (mean degradation: 66%) and Ct (58%) could achieve alone. 361  
315 Interestingly, Ac's growth was also significantly promoted 362  
316 by the three degrader species (Fig. 3E, Ac row, light green 363  
317 highlight) and while it did not reduce the growth of the de- 364  
318 graders much, it greatly reduced their capacity to degrade, 365  
319 particularly for At1 (mean degradation: 13% as opposed 366  
320 to 50% when grown alone). These results suggest that Ac 367  
321 may have acted as a "free-rider" species that got carried 368  
322 along with the best communities. We tested this idea by 369  
323 removing Ac from the winning community and observed a 370  
324 reduced variability in its performance (Fig. 3C). Remov- 371  
325 ing it from the fourth-best community also significantly in- 372  
326 creased the community degradation score (degradation of 373  
327 Ct+Af+Ac+Ea:  $30.2 \pm 4.5\%$ , vs. Ct+Af+Ea:  $47.3 \pm 3.5\%$ , t- 374  
328 test,  $p = 0.0012$ ), whereas removing Ct from this community 375  
329 drastically reduced its degradation score (Af+Ac+Ea:  $4.7 \pm 376$   
330  $1.2\%$ ,  $p < 0.001$ , Fig. 3C). 377

331 In sum, selection appears to have favored communities with 378

at least one good degrader species, especially if its score  
could be enhanced by "weaker" species, as long as they did  
not cause extinctions. This approach does not seem to elim-  
inate free-riders that appear in the final communities despite  
their deleterious effects on degradation scores.

### Did the best communities improve compared to their ancestors?

Up to this point, we have viewed our disas-  
sembly selection approach as a way to recombine different  
species in our original set in a way that increases the degra-  
dation scores. As bacteria undergo many cell divisions over  
the course of the experiment, however, we may also expect  
within-species genetic evolution to have modified the partic-  
ipating species themselves compared to the ancestral strains  
we started with. Within-species selection may act to increase  
growth rates, for example, or to reduce antagonistic geno-  
types that would cause the extinction of other species in the  
community, bringing down community score.

To determine whether the species at the end of the experi-  
ment grew or degraded differently from their ancestors, we  
compared the 11 species isolated from the different treat-  
ments to their ancestors, measuring their degradation and  
population sizes (Fig. 4A, B). We found that Ct isolated from  
the selection treatment grew significantly better than its an-  
cestor ( $3.8 \times 10^8 \pm 2.2 \times 10^8$  vs.  $3.3 \times 10^7 \pm 4.1 \times 10^7$ ,  
Wilcoxon rank sum,  $df = 79$ ,  $p = 4.72 \times 10^{-16}$ ) and than  
its counterpart isolated from the random control treatment  
( $9.92 \times 10^7 \pm 8.68 \times 10^7$ ,  $df = 71$ ,  $p = 1.1 \times 10^{-12}$ ). The  
strain of Ct from the selection treatment also degraded sig-  
nificantly worse than its ancestor ( $51.7 \pm 5.2$  vs.  $56.4 \pm 5.5\%$ ,  
 $df = 79$ ,  $p = 0.00054$ ), suggesting that it may have evolved to  
invest more into biomass and less into degradation, but we do  
not explore this idea further. Other than that, no significant  
effects were observed.

We were also curious to see whether inter-species interac-  
tions had changed throughout the selection treatment. In-  
deed, we had chosen to conduct this experiment in growth  
medium containing casamino acids (see Methods), as we  
knew from previous work that competition was stronger in  
this environment compared to MWF without casamino acids  
(32) and we wondered whether selection could reduce com-  
petition. We first used the population size data to estimate  
these interactions in the ancestral species (Fig. 4C), where  
we confirmed that competition was common. We also con-  
firmed previous findings that species that could not grow well  
alone tended to be affected positively by others, particularly  
by strong growers (Fig. 4C, 3E) (32, 34).

We then selected a few pairs from the random and selec-



410 was achieved by two species in co-culture: At1 and Af. 458  
411 Adding two more species to this pair (Ct and particularly the 459  
412 free-rider Ac) increased the variance in community perfor- 460  
413 mance, and combining all 11 species performed particularly 461  
414 poorly (Fig. 3). It appears then that our optimal community 462  
415 of four species is in fact too rich. 463

416 Another key observation is that despite our efforts to fa- 464  
417 vor within-species evolution – we sampled many colonies 465  
418 when disassembling communities through plating to include 466  
419 sufficient within-species diversity, and used a competition- 467  
420 promoting medium to give room for interactions to evolve to 468  
421 become less negative or more positive – it did not have a large 469  
422 effect on final population sizes, degradation abilities or inter- 470  
423 species interactions. One explanation may be that species are 471  
424 changing their biotic environment too often for selection to 472  
425 favor any particular interactions. In agreement with this, the 473  
426 only change we observed is that Ct evolved in the selection 474  
427 treatment grew better than its ancestor alone, and was less 475  
428 negatively affected by others than its ancestor (Fig. 4). It 476  
429 could be that Ct evolved to invest less into degradation and 477  
430 more into growth, although we currently have no evidence to 478  
431 back this up. The up-side of finding only minor changes is 479  
432 that one may not need to be too concerned that species will 480  
433 evolve to become more competitive or invest less into com- 481  
434 munity function, at least on this time-scale. 482

435 Given what we have learned, would we now perform arti- 483  
436 cial selection differently? After all, the approach was quite 484  
437 cumbersome and would not be easy to set up for a new prob- 485  
438 lem. 486

439 A first question is whether the artificial selection approach is 487  
440 useful at all, or whether we could have predicted the compo- 488  
441 sition of the best community using fewer culture experiments. 489  
442 To explore this question, we performed an additional analy- 490  
443 sis using a simple linear model that predicts the degradation 491  
444 score based on species presence/absence (4). Including the 492  
445 data from all our experiments, the linear model had a rea- 493  
446 sonable fit ( $R^2 = 0.75$ ) and would have chosen a community 494  
447 that performed relatively well (degradation score: 69.2%). 495  
448 However, if we only used mono- and co-culture data to fit 496  
449 the model, performance dropped ( $R^2 = 0.26$ ) and the best 497  
450 predicted communities ranged in performance from 40.3% to 498  
451 83.1% (Fig. 5A, B). This analysis suggests that the “fitness 499  
452 landscape” of MWF-degrading communities is quite rugged, 500  
453 in line with the non-uniformity of the Hamming distance 501  
454 analysis in Fig. 1D. It would be interesting to determine the 502  
455 minimal amount of data needed to achieve a good prediction 503  
456 and explore whether other prediction methods would perform 504  
457 better (e.g. (35)). 505

A second lesson could be to focus on the strength of our method as a search algorithm to efficiently explore the space of possible species combinations, analogous to a genetic algorithm (30, 31). As allowing the species to evolve within these communities did not seem to change much, it would be simpler to start communities at every round from frozen stocks and avoid the challenging experimental step of disassembling communities (as illustrated in Fig. 5C). We would then no longer need selective media for all species in the pool and it would suffice to know whether species went extinct, which could be achieved through amplicon sequencing. Another important modification would be to allow community size to change, as opposed to restricting it to four species as we have done here. This would involve removing or adding species independently, allowing communities to grow or shrink in size. This decoupling would increase the search space of possible combinations, but might find better solutions, for example by avoiding free-rider species like Ac to establish in so many communities.

Allowing community size to change automatically would also answer an important question for community function: how many species are actually needed to solve the problem of interest? In our previous work (32), a mathematical model predicted that in harsher environments, more species are needed to achieve maximal community function compared to permissive environments. Experimentally, degradation saturated at two species in the more permissive MWF with casamino acids, compared to three species in MWF alone (32), which is consistent with our best solution here having only two species. In hindsight, a more challenging environment might have shown a stronger improvement over the experiment and required a larger optimal community.

A final important limitation of our approach is that we fixed the initial population size of all species at each round, in order to select against cheater strains that grow quickly without contributing, and to improve heritability of the community function (27). It would be interesting to see how our best-performing communities would equilibrate over a few rounds of growth and dilution, when we do not adjust the initial population sizes. It is conceivable that the performance of the community at equilibrium would be different. Ideally, community stability should be part of the community score, although this would require substantial revision to the selection algorithm.

In summary, we have tested an approach to artificially select amongst communities composed of different combinations of culturable species. Our approach found a four-species community that is efficient at degrading MWF pollutants and is



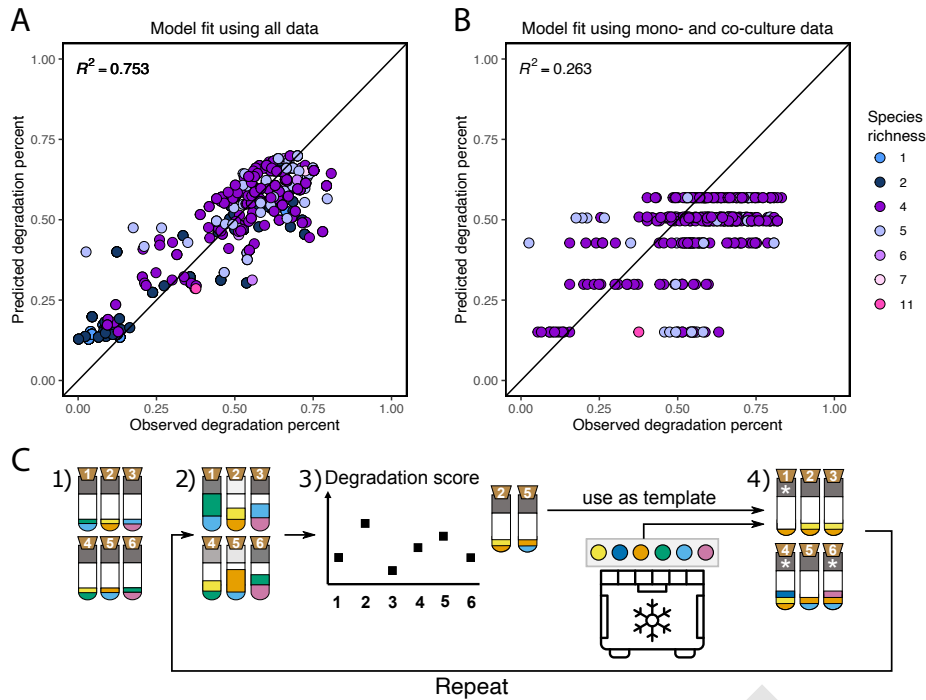

**Fig. 5.** A-B) Linear model analysis. We use a linear model (code taken from (4)) that uses species presence/absence to predict degradation percent based on A) all the data we generated, or B) only the mono- and co-culture data. Community richness is shown in color. Each dot is one degradation score measurement, such that biological replicates and technical replicates, if available, are all represented. C) Proposing a new artificial selection method. Rather than disassembling communities, we propose to use the winning communities as templates to generate the offspring communities in the next round. These communities would then be seeded by taking the clonal ancestral species from the freezer, such that there would be no within-species evolution over rounds. Step 3) would be to select the top 10 communities, 4a) to generate communities in proportion to their community scores and 4b) to randomly choose 21/29 of the new communities (illustrated with 4). Freezer icon created by SAM Designs from Noun Project.

superior to the performance of all species in our pool grown together. However, the selection experiment was relatively complex and a smaller community was also found by testing species pairs and comparing them to the winning community. Going forward, we propose a simpler, more effective approach (Fig. 5C). Even though the challenges of ensuring ecological and evolutionary stability remain open, we argue that this first proof-of-concept supports the blind approach to automate the breeding of bacterial communities with optimal functions.

## Methods and Materials

**Bacterial species and culture conditions.** We used 11 bacterial species listed in Table 1. At1, Ct and MI were previously isolated from MWF as previously described (32, 36, 37). Note that MI (*Microbacterium liquefaciens*) was previously referred to as *Microbacterium saperdae* but a more recent classification has led us to refer to it differently. At2 was kindly donated by Justine Collier (plant associated) and the remaining species were isolated from MWF and kindly donated to us by Peter Kuenzi from Blaser Swisslube AG. The species were identified at Blaser Swisslube AG by MALDI-TOF, and confirmed by PCR amplification and 16S gene se-

quencing. All experiments were performed in 6ml batch cultures containing 0.5% (v/v) Castrol Hysol™ XF MWF (acquired in 2016) diluted in water with added salts, metal traces (Tables 2, 3), and supplemented with 1% Casamino Acids (Difco, UK). Cultures were incubated at 28°C, shaken at 200 rpm.

| Species                                   | Our acronym |
|-------------------------------------------|-------------|
| <i>Staphylococcus warneri</i>             | Sw          |
| <i>Agrobacterium tumefaciens</i> MWF001   | At1         |
| <i>Comamonas testosteroni</i> MWF001      | Ct          |
| <i>Microbacterium liquefaciens</i> MWF001 | MI          |
| <i>Alcaligenes faecalis</i>               | Af          |
| <i>Aeromonas caviae</i>                   | Ac          |
| <i>Enterococcus avium</i>                 | Ea          |
| <i>Klebsiella pneumoniae</i>              | Kp          |
| <i>Pseudomonas fulva</i>                  | Pf          |
| <i>Providencia rettgeri</i>               | Pr          |
| <i>Agrobacterium tumefaciens</i> C58      | At2         |

**Table 1.** Bacterial species used in the experiment and the acronyms we use to refer to them throughout the manuscript.

| Compound                        | Amount  |
|---------------------------------|---------|
| H <sub>2</sub> O                | 1000 ml |
| K <sub>2</sub> HPO <sub>4</sub> | 6 g     |
| KH <sub>2</sub> PO <sub>4</sub> | 6 g     |

**Table 2.** Phosphate solution (1%) for the MWF+AA medium as described in Table 3.

| Compound                           | Amount |
|------------------------------------|--------|
| H <sub>2</sub> O                   | 405 ml |
| Phosphate solution                 | 60 ml  |
| NaCl 1% solution                   | 60 ml  |
| Casamino 1% acids solution         | 60 ml  |
| Hutner's vitamin-free mineral base | 12 ml  |
| Castrol Hysol 100%                 | 3 ml   |

**Table 3.** For 600 ml of MWF+AA medium, mix in the above order, top to bottom. The phosphate solution is found in Table 2. The MWF needs to be added carefully, one drop at a time to allow mixing.

**Selective media.** We designed 10 selective media that allow the growth of only one or two of the 11 species at a time. Some species combinations (Ct & At<sub>2</sub>, Af & Ct, MI & Sw, MI & Ea, Ac & Pf, Ct & Kp) cannot be easily distinguished on these media, and we avoided combining these species in the communities (Fig. S6A). This means that instead of the 330 combinations of 4 species out of 11, we have 174 possible communities. Our selective media are generally composed of a rich base and at least one antibiotic (details in Tables S2 and S3). The disassembly plates consist of two 24-well plates where we poured 1.5ml of each selective media into 4 wells (as shown in the 24-well templates in Fig. S6B). Because temperature was helpful to distinguish some species, we incubated some media at 28°C and others at 37°C. Disassembly was achieved by plating droplets of each diluted community on all the selective media (more details below). For each round, we prepared the disassembly plates one week in advance and stored them at 4°C in the dark until they were used. Every week, the selectivity of the media was verified by inoculating 10µl droplets from a dilution series of 2-day old cultures of all 11 ancestral species in square plates of all selective media.

**Artificial Selection.** Each round of the selection experiment lasted one week and consisted of five steps (Fig. 1): (1) assembling communities and letting them grow, (2) measuring pollution load, (3) selecting top communities and disassembling them on agar plates, (4) freezing down species samples, and (5) generating species compositions for the next round.

**Community assembly.** In each round, we used 60 10ml glass tubes, 29 were assigned to communities of the selection treat-

ment, 29 to the random treatment and two tubes were abiotic controls. The first round started with the same 29 randomly generated communities of 4 species each in the two treatments. These were drawn such that all 11 species were present in at least one community and such that species that we cannot separate with selective plates never appear in the same community.

Communities for the first round were assembled as follows: Single colonies of each of the 11 species were picked and grown overnight in 5mL of TSB at 28°C, shaken at 200rpm. The next day, cultures were adjusted to an OD<sub>600</sub> of 0.05 in 10ml of PBS in a 15ml falcon tube. For subsequent rounds, similar 15ml tubes containing each of the 11 species for each treatment at OD<sub>600</sub>=0.05 were taken from the freezer (see below) and thawed. The cells were then washed by centrifuging at 4000rpm for 15 minutes and resuspended in 10ml of MWF+AA medium (see above). For each community culture in the experiment (29 for each treatment) and the abiotic controls, 6ml of MWF+AA were prepared in the 10ml glass tubes and 100µl of each species were added, yielding a total of 400µl of four species of similar relative abundances. All 60 tubes were then incubated at 28°C and shaken at 200 rpm for four days.

**Measuring degradation scores.** On day 4, as a proxy for pollution load, we measured the chemical oxygen demand (COD) using NANOCOLOR COD tube tests (detection range 1-15 g/l by Macherey-Nagel (ref: 985 038), see (32) for more details). We used these measurements to calculate degradation scores as  $(1 - \text{COD}_4(\text{sample})/\text{COD}_4(\text{control})) \times 100$ , i.e. the COD of the community after 4 days relative to the COD of the abiotic control after 4 days, in percent. Data shown in Fig. 3C was generated using expired COD tubes, which explains why their values are different from those of the other experiments. However, given that the important comparison is between treatments within that experiment, we decided not to repeat it.

**Selecting and disassembling top communities.** We selected the 10 out of 29 communities with the highest degradation scores from the selection treatment and 10 out of 29 communities at random from the random treatment. To disassemble the communities and determine species' population sizes, we plated dilutions ( $10^{-1}$ ,  $10^{-2}$ ,  $10^{-4}$  and  $10^{-6}$ ) of each community onto all selective media (see above, Fig. S6), incubated the selective plates for two days (either at 28°C or 37°C), and counted colony-forming units (CFUs) for each species. This allowed us to disassemble all community mem-

611 bers, estimate population sizes and identify extinction and 658  
612 contamination events (species that were inoculated on day 0 659  
613 but did not appear on their selective media, and species that 660  
614 were not inoculated in a given community but grew on selec- 661  
615 tive media, respectively). We penalized extinction by scaling 662  
616 the degradation score of each community by the fraction of 663  
617 surviving species (contaminants are not counted)  $0 < f < 1$   
618 (e.g.  $f = 0.5$  if only two of the four inoculated species are  
619 detected). The final community score was then calculated as  
620  $(1 - \text{COD}_4(\text{sample})/\text{COD}_4(\text{control})) \times 100 \times f$ .

621 **Freezing down species.** At every round of selection, we froze  
622 down a representative of each species by isolating it from the  
623 highest-scoring community where that species was present.  
624 We sampled several CFUs from the highest dilution in the  
625 relevant selective plate by adding PBS to the selected well  
626 and re-suspending by pipetting. We then adjusted the  $\text{OD}_{600}$   
627 of the samples to 0.05 in a total volume of 10 ml of PBS with  
628 25% glycerol, then aliquoted  $2 \times 1\text{ml}$  for long-term storage  
629 in cryo tubes, 3ml for use in the following round and 5ml as  
630 backup in 15ml falcon tubes and froze all samples at  $-80^\circ\text{C}$ .  
631 If a species went extinct in a round of selection, we recovered  
632 it from its frozen stock collected in a previous round.

633 **Generating new species compositions.** For the following  
634 round of selection, we used a script that calculates a proba-  
635 bility distribution from the community scores of the 10 disas-  
636 sembled communities and generates offspring communities  
637 by randomly sampling 29 times with replacement in propor-  
638 tion to this distribution. Communities with higher scores are  
639 more likely to be selected. In the random control, we sampled  
640 29 times with uniform probability from the 10 disassembled  
641 communities.

642 To introduce variability into these newly generated commu-  
643 nities, out of the 29 generated communities in each treatment,  
644 we randomly chose 21 to receive an invader species that re-  
645 placed one of the four members. Both the invader and the  
646 species to be removed were chosen by uniform probability,  
647 with a few exceptions: We first chose as invaders species  
648 that were not yet represented in any offspring communities,  
649 adding them to random receiving communities; once all 11  
650 species were represented at least once in the new communi-  
651 ties, we chose the remaining invaders at random but avoided  
652 invading species that were already present in the receiving  
653 community, and species that are indistinguishable from res-  
654 ident species on our selective media. Selection and inva-  
655 sion thereby result in  $2 \times 29$  lists of four species each, sam-  
656 pled in proportion to degradation scores (or not for the ran-  
657 dom treatment) and with 21/29 of them having exchanged an

old community member for a new one. We then assembled  
the communities in the lab from the frozen species record  
as described above. The script used to automatically gener-  
ate offspring communities is written in python 3 (38) and  
can be found at [https://github.com/Mitri-lab/  
disassembly\\_selection\\_experiment.git](https://github.com/Mitri-lab/disassembly_selection_experiment.git).

**Comparing ancestral and evolved strains.** Following the  
artificial selection experiment, we conducted follow-up ex-  
periments to better understand why the selection algorithm  
favored certain species combinations. For each species, the  
frozen stocks from round 18 of the selection and random  
treatments were plated and incubated. Single colonies were  
picked and grown overnight in 5mL of TSB at  $28^\circ\text{C}$ , shaken  
at 200rpm. The next day, cultures were adjusted to an  $\text{OD}_{600}$   
of 0.05 in 10ml of TSB and grown for a further 3h. The  
cells were then washed at 4000rpm for 15 minutes and re-  
suspended in 10ml of MWF+AA medium. For each culture,  
6ml of MWF+AA were prepared in 10ml glass tubes and  
100 $\mu\text{l}$  of each species were added. These cultures were in-  
cubated at  $28^\circ\text{C}$ , shaken at 200rpm for 3 days. CFUs were  
measured through serial dilution and plating on days 0, 1, 2  
and 3 using the appropriate selective media (Fig. S6). We  
measured CODs of an abiotic control culture at day 0 and  
3, and the culture tubes at day 3. The degradation scores  
were calculated as before. To estimate interactions between  
species, we grew each strain alone or with a given partner  
strain and compared the population size of each focal strain  
as the  $\log_2$  fold-change in CFU/ml on day 3 in the presence  
or absence of the partner species. CFU/ml were quantified on  
selective media (Fig. S6), but on round agar plates consider-  
ing all dilutions, giving higher resolution compared to the se-  
lection experiment. We used LB agar for Af and Pf instead of  
their selective media, as requirements were less stringent (we  
only need to count them, not disassemble them) and there  
appeared to be differences in growth between the ancestral  
and evolved strains on the selective media for those species.  
These experiments were performed by two different authors  
(GA and BV), which is accounted for in the statistical analy-  
sis (see below).

**Data analysis.** We used the Hamming distance between two  
communities to quantify the difference in species composi-  
tion between them (Fig. 1). The community is in this case  
represented by the presence and absence of each of the 11  
species, and the Hamming distance is the fraction of species  
mismatches. We used the implementation from the SciPy li-  
brary in python (39).

We calculated evenness as the effective species number, or Hill number of order 1 (40):

$${}^1D = \exp\left(-\sum_k p_k \log(p_k)\right), \quad (1)$$

divided by its maximum value (similar to Pielou's evenness (33)), where  $p_k$  is the relative abundance of species  $k$  in the community. Ordinary least squares regression between evenness and round was calculated using the python package *statsmodels* (41).

We used parametric and non-parametric tests for significant differences between groups, preferring the Student's t-test for the former and the Wilcoxon rank sum test for the latter, and compared distributions using the Kolmogorov–Smirnov test. We measured correlations using Spearman's  $\rho$  and quantified regressions using the ordinary least-squares implementation in the python library *statsmodels*, (41). When relevant, we corrected for multiple comparisons using the Bonferroni method.

To compare the growth and interactions of evolved and ancestral strains, we took into account that experiments were performed by two different people. To calculate statistical significant differences in growth or degradation, *experimentalist* was taken to be a random factor in a generalized linear model. To calculate interactions (one species growing in mono- versus co-culture), we only used data collected by the same experimentalist. If it was not available (only one person had measured the mono-cultures), we used this instead (see dataset 1).

## Contributions and acknowledgements

FAS, SM and BV conceived the project. FAS developed the experimental methods. BV implemented the selection method. AH performed the selection experiment and FAS, BV and GA follow-up experiments. FAS, BV and SM analysed the data. FAS, BV and SM wrote the paper. Thanks to members of the Mitri lab for discussions, especially to Margaret Vogel and Afra Salazar for detailed comments, to Peter Küenzi (Blaser Swissslube) and Justine Collier (UNIL) for bacterial strains. We sincerely thank Samuele E. A. Testa, who trained BV in the lab and helped with experiments. Thanks to Marc Garcia-Garcerà and Bastien Vallat for helping identify the strains from Blaser.

1. Christopher E. Lawson, William R. Harcombe, Roland Hatzenpichler, Stephen R. Lindemann, Frank E. Löffler, Michelle A. O'Malley, Héctor García Martín, Brian F. Pfeleger, Lutzgarde Raskin, Ophelia S. Venturelli, David G. Weissbrodt, Daniel R. Noguera, and Katherine D. McMahon. Common principles and best practices for engineering microbiomes. *Nature Reviews Microbiology*, 17(12):725–741, 2019.

2. Bryce M. Connors, Sarah Ertmer, Ryan L. Clark, Jaron Thompson, Brian F. Pfeleger, and Ophelia S. Venturelli. Model-guided design of the diversity of a synthetic human gut community. *bioRxiv*, page 2022.03.14.484355, 2022.
3. Alvaro Sanchez, Djordje Bajic, Juan Diaz-Colunga, Abigail Skwara, Jean C.C. Vila, and Seppe Kuehn. The community-function landscape of microbial consortia. *Cell Systems*, 14(2):122–134, 2023.
4. Abigail Skwara, Karna Gowda, Mahmoud Yousef, Juan Diaz-Colunga, Arjun S. Raman, Alvaro Sanchez, Mikhail Tikhonov, and Seppe Kuehn. Learning the functional landscape of microbial communities. *bioRxiv*, 534159:2023.03.24.534159, 2023.
5. Flor I. Arias-Sánchez, Björn Vessman, and Sara Mitri. Artificially selecting microbial communities: If we can breed dogs, why not microbiomes? *PLOS Biology*, 17(8):e3000356, 2019.
6. Álvaro Sánchez, Jean C.C. Vila, Chang-Yu Chang, Juan Diaz-Colunga, Sylvie Estrela, and María Rebolledo-Gomez. Directed evolution of microbial communities. *Annual Review of Biophysics*, 50(1):null, 2021. PMID: 33646814.
7. Jikun Huang, Carl Pray, and Scott Rozelle. Enhancing the crops to feed the poor. *Nature* 2002 418:6898, 418(6898):678–684, 2002.
8. Keqin Chen and Frances H. Arnold. Enzyme engineering for nonaqueous solvents: Random mutagenesis to enhance activity of subtilisin E in polar organic media. *Nature Biotechnology*, 9:1073–1077, 1991.
9. Sheenam Verma and Dinakar M. Salunke. Directed evolution – bringing the power of evolution to the laboratory : 2018 Nobel Prize in Chemistry. *Current Science*, 115(9):1627–1630, 2018.
10. Janet Karpinski, Ilona Hauber, Jan Chemnitz, Carola Schäfer, Maciej Paszkowski-Rogacz, Deboyoti Chakraborty, Niklas Beschoner, Helga Hofmann-Sieber, Ulrike C. Lange, Adam Grundhoff, Karl Hackmann, Evelin Schrock, Josephine Abi-Ghanem, M. Teresa Pisabarro, Vineeth Surendranath, Axel Schambach, Christoph Lindner, Jan Van Lunzen, Joachim Hauber, and Frank Buchholz. Directed evolution of a recombinase that excises the provirus of most HIV-1 primary isolates with high specificity. *Nature Biotechnology* 2016 34:4, 34(4): 401–409, 2016.
11. William Swenson, Jeff Arendt, and David Sloan Wilson. Artificial selection of microbial ecosystems for 3-chloroaniline biodegradation. *Environmental Microbiology*, 2(5):564–571, 2000.
12. W. Swenson, D. S. Wilson, and R. Elias. Artificial ecosystem selection. *Proceedings of the National Academy of Sciences*, 97(16):9110–9114, 2000.
13. Jigyasa Arora, Margaret Mars Brisbin, and Alexander S. Mikheyev. The microbiome wants what it wants: microbial evolution overtakes experimental host-mediated indirect selection. *bioRxiv*, page 706960, 2019.
14. Samuel Jacquiod, Aymé Spor, Shaodong Wei, Victoria Munkager, David Bru, Søren J. Sørensen, Christophe Salon, Laurent Philippot, and Manuel Blouin. Artificial selection of stable rhizosphere microbiota leads to heritable plant phenotype changes. *bioRxiv*, 2021.
15. Michael D. Jochum, Kelsey L. McWilliams, Elizabeth A. Pierson, and Young Ki Jo. Host-mediated microbiome engineering (HMME) of drought tolerance in the wheat rhizosphere. *PLOS ONE*, 14(12):e0225933, 2019.
16. Ulrich G. Mueller, Thomas E. Juenger, Melissa R. Kardish, Alexis L. Carlson, Kathleen M. Burns, Joseph A. Edwards, Chad C. Smith, Chi-Chun Fang, and David L. Des Marais. Artificial Selection on Microbiomes To Breed Microbiomes That Confer Salt Tolerance to Plants. *mSystems*, 2021.
17. Kevin Panke-Buisse, Angela C Poole, Julia K Goodrich, Ruth E Ley, and Jenny Kao-Kniffin. Selection on soil microbiomes reveals reproducible impacts on plant function. *The ISME Journal*, 9(4):980–989, 2015.
18. Kevin Panke-Buisse, Stacey Lee, and Jenny Kao-Kniffin. Cultivated Sub-Populations of Soil Microbiomes Retain Early Flowering Plant Trait. *Microbial Ecology*, 73(2):394–403, 2017.
19. Manuel Blouin, Battle Karimi, Jérôme Mathieu, and Thomas Z. Lerch. Levels and limits in artificial selection of communities. *Ecology Letters*, 18(10):1040–1048, 2015.
20. Chang-Yu Chang, Melisa L. Osborne, Djordje Bajic, and Alvaro Sanchez. Artificially selecting bacterial communities using propagule strategies†. *Evolution*, 74(10):2392–2403, 2020.
21. Robyn J Wright, Matthew I Gibson, and Joseph A Christie-Oleza. Understanding microbial community dynamics to improve optimal microbiome selection. *Microbiome*, 7(1):85, 2019.
22. Tiffany Raynaud, Marion Devers, Aymé Spor, and Manuel Blouin. Effect of the Reproduction Method in an Artificial Selection Experiment at the Community Level. *Frontiers in Ecology and Evolution*, 7:416, 2019.
23. Tiffany Raynaud, Marion Devers-Lamrani, Aymé Spor, and Manuel Blouin. Community diversity determines the evolution of synthetic bacterial communities under artificial selection. *Evolution*, 76(8):1883–1895, 2022.
24. U.G. Mueller and J.L. Sachs. Engineering Microbiomes to Improve Plant and Animal Health. *Trends in Microbiology*, 23(10):606–617, 2015.
25. C J Goodnight and L Stevens. Experimental studies of group selection: what do they tell us about group selection in nature? *The American naturalist*, 150 Suppl(S1):S59–79, 1997.
26. C J Goodnight. Heritability at the ecosystem level. *Proceedings of the National Academy of*



- 819 *Sciences of the United States of America*, 97(17):9365–6, 2000.
- 820 27. Li Xie, Alex E. Yuan, and Wenyang Shou. Simulations reveal challenges to artificial commu-  
821 nity selection and possible strategies for success. *PLOS Biology*, 17(6):e3000295, 2019.
- 822 28. Guilhem Doucier, Amaury Lambert, Silvia De Monte, and Paul B Rainey. Eco-evolutionary  
823 dynamics of nested darwinian populations and the emergence of community-level heredity.  
824 *eLife*, 9:e53433, 2020.
- 825 29. Björn Vessman, Pablo Guridi-Fernández, Flor Inés Arias-Sánchez, and Sara Mitri. Novel  
826 artificial selection method improves function of simulated microbial communities. *bioRxiv*,  
827 page 2023.01.08.523165, 2023.
- 828 30. John H. Holland. *Adaptation in natural and artificial systems: An introductory analysis with*  
829 *applications to biology, control, and artificial intelligence*. 1976. .
- 830 31. Alexander Lalejini, Emily Dolson, Anya E Vostinar, and Luis Zaman. Artificial selection meth-  
831 ods from evolutionary computing show promise for directed evolution of microbes. *eLife*, 11,  
832 2022.
- 833 32. Philippe Piccardi, Björn Vessman, and Sara Mitri. Toxicity drives facilitation between 4 bac-  
834 terial species. *Proceedings of the National Academy of Sciences*, 116(32):15979–15984,  
835 2019.
- 836 33. E. C. Pielou. *Ecological diversity*. .
- 837 34. Jared Kehe, Anthony Ortiz, Anthony Kulesa, Jeff Gore, Paul C. Blainey, and Jonathan Fried-  
838 man. Positive interactions are common among culturable bacteria. *Science Advances*, 7  
839 (45):7159, 2021.
- 840 35. Juan Diaz-Colunga, Abigail Skwara, Jean C C Vila, Djordje Bajic, and ´ Alvaro S ´  
841 Anchez. Global epistasis and the emergence of ecological function. *bioRxiv*, page  
842 2022.06.21.496987, 2023.
- 843 36. Christopher J van der Gast and Ian P Thompson. Effects of pH amendment on metal work-  
844 ing fluid wastewater biological treatment using a defined bacterial consortium. *Biotechnol-*  
845 *ogy and Bioengineering*, 89(3):357–66, 2005.
- 846 37. Christopher J. van der Gast and Ian P. Thompson. US 8,703,475 B2.
- 847 38. Guido Van Rossum and Fred L. Drake. *Python 3 Reference Manual*. CreateSpace, Scotts  
848 Valley, CA, 2009. .
- 849 39. Pauli Virtanen, Ralf Gommers, Travis E. Oliphant, Matt Haberland, Tyler Reddy, David Cour-  
850 napeau, Evgeni Burovski, Pearu Peterson, Warren Weckesser, Jonathan Bright, Stéfan J.  
851 van der Walt, Matthew Brett, Joshua Wilson, K. Jarrod Millman, Nikolay Mayorov, Andrew  
852 R. J. Nelson, Eric Jones, Robert Kern, Eric Larson, C J Carey, İlhan Polat, Yu Feng, Eric W.  
853 Moore, Jake VanderPlas, Denis Laxalde, Josef Perktold, Robert Cimrman, Ian Henriksen,  
854 E. A. Quintero, Charles R. Harris, Anne M. Archibald, Antônio H. Ribeiro, Fabian Pedregosa,  
855 Paul van Mulbregt, and SciPy 1.0 Contributors. SciPy 1.0: Fundamental Algorithms for Sci-  
856 entific Computing in Python. *Nature Methods*, 17:261–272, 2020.
- 857 40. Anne Chao, Chun-Huo Chiu, Lou Jost, A Chao, C.-H Chiu, and L Jost. Phylogenetic Diver-  
858 sity Measures and Their Decomposition: A Framework Based on Hill Numbers. *Topics in*  
859 *Biodiversity and Conservation*, 14:141–172, 2016.
- 860 41. Skipper Seabold and Josef Perktold. statsmodels: Econometric and statistical modeling  
861 with python. In *9th Python in Science Conference*, .
